# Supplementary material
Source: Springer Nature journal article supplement (https://www.springermedizin.de/resource/supplementary/12888_2012_1331_MOESM3_ESM.pdf/9479888)
Supplement: MOESM3 [file 9479888]

|                        |     |         |    |
|------------------------|-----|---------|----|
| Sequence generation    | Yes | Unclear | No |
| Allocation concealment | Yes | Unclear | No |
| Blinding               | Yes | Unclear | No |
| Missing Data           | Yes | Unclear | No |
| Selective Reporting    | Yes | Unclear | No |
| Other Bias             | Yes | Unclear | No |

|     |         |    |
|-----|---------|----|
| Yes | Unclear | No |
|-----|---------|----|
